# Supplementary material
Source: PubMed Central journal article supplement (PMC7049150)
Supplement: pnas.1912082117.sapp.pdf [file pnas.1912082117.sapp.pdf]

# PNAS

[www.pnas.org](http://www.pnas.org)

Supplementary Information for

**Heat shock proteases promote survival of *Pseudomonas aeruginosa* during growth arrest**

David W. Basta, David Angeles-Albores, Melanie A. Spero, John A. Ciemniecki, Dianne K. Newman

Dianne K. Newman  
Email: [dkn@caltech.edu](mailto:dkn@caltech.edu)

**This PDF file includes:**

Supplementary Text  
Figures S1 to S7  
Tables S1 to S4  
Legends for Datasets S1 and S2  
SI References

**Other supplementary materials for this manuscript include the following:**

Datasets S1 and S2

## Supplementary Text

The morphology of growth-arrested  $\DeltaftsH$  cells of *P. aeruginosa* was similar to the phenotype of a gain-of-function mutation in *mlaA* (designated *mlaA\**) in *E. coli* during growth arrest (1). *mlaA\** mutants aberrantly transport phospholipids to the outer leaflet of the OM, which normally comprises almost exclusively LPS (1, 2). The accumulation of phospholipids in the outer leaflet triggers compensatory LPS synthesis via increased activity of LpxC, which ultimately destabilizes the OM and leads to vesiculation and loss of OM lipids (1, 3, 4). During growth, lost lipids can be replenished by ongoing synthesis and transport from the IM to the OM. Upon growth arrest, however, *de novo* lipid synthesis ceases while lipid loss from the OM continues unabated. The continual transport of lipids from the IM to the OM results in shrinkage of the IM and ultimately cell lysis (1). Lysis could be suppressed by adding  $MgCl_2$  or  $CaCl_2$  to LB, because cations stabilize the negatively charged LPS and prevent vesiculation and lipid loss (1, 2). Importantly, increased LpxC activity in *mlaA\** is believed to be caused by reduced FtsH proteolysis (1, 3). Thus, deletion of *ftsH* in *P. aeruginosa* could compromise cell integrity by inducing LPS overproduction, phenocopying the results in *E. coli*.

Although FtsH does not regulate LpxC in *P. aeruginosa* during growth (5), it is possible that it regulates LpxC specifically upon entry into growth arrest. In support of this possibility, LpxC degradation has been shown to inversely correlate with growth rate in *E. coli*, highlighting the importance of tightly coordinating LPS synthesis with the cellular demand (6). Thus, we performed experiments to test the hypothesis that LPS overproduction in  $\DeltaftsH$  results in cell death of *P. aeruginosa* during growth arrest.

Cation supplementation could suppress lysis of  $\DeltaftsH$  in stationary phase in a dose-dependent manner (Fig. S3A and B), although the cation concentration necessary for complete suppression was much greater than that required in *E. coli* (100 mM vs. 5 mM  $MgCl_2$ ) (1). However, suppression of lysis did not suppress cell death (Fig. S3C and D). The high cation concentration simply preserved the “carcasses” of dead cells (Fig. S3E). Furthermore, during carbon starvation cation supplementation had a mildly positive, but transient, effect on viability



(Fig. S3F) and only partially reduced the abundance of “detached” and “ghost” cells (Fig. S3G). Treatment with the LpxC inhibitor CHIR-090 (7) during growth arrest or at sub-inhibitory concentrations during pre-growth of cultures had no effect on survival (Fig. S3H-J). Finally, we measured LPS levels directly and observed no difference between WT and  $\DeltaftsH$  during exponential growth or stationary phase (Fig. S3K). Therefore, we conclude that LPS production is unaltered in growth-arrested *P. aeruginosa* in the absence of FtsH.

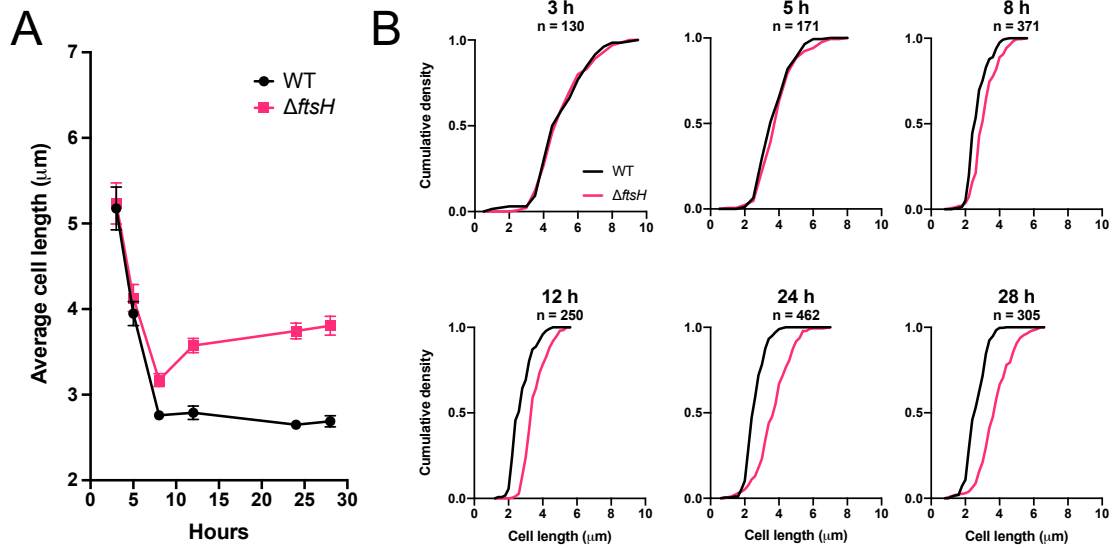

**Fig. S1. Cell length diverges between WT and  $\DeltaftsH$  during stationary phase.** (A) Overnight cultures grown in LB were diluted to a starting  $OD_{500}$  of 0.01 and incubated at 37°C. Samples were taken for microscopy at the indicated time points and the average cell length is plotted over time. Cells entered stationary phase at ~8 h. Time points were taken in conjunction with the viability measurements in Fig. S3C and all data are derived from a single experiment. Error bars show 95% confidence intervals. (B) Empirical cumulative frequency distributions of cell length at each time point in (A).

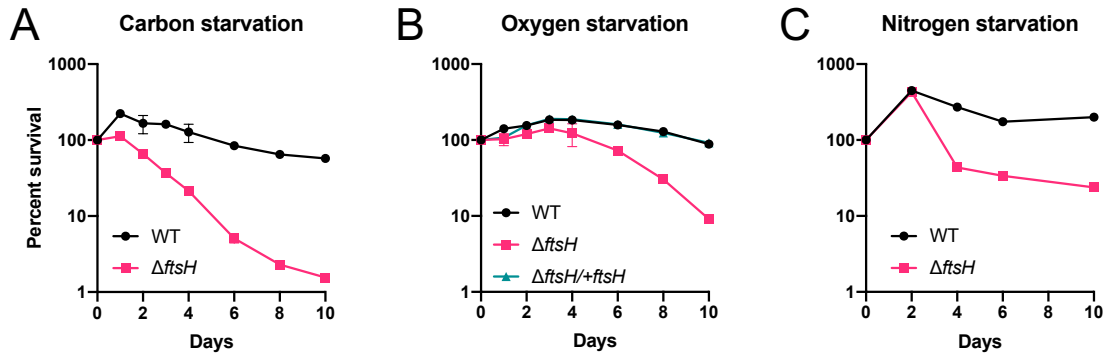

**Fig. S2. FtsH is generally required for survival during growth arrest.** Survival during carbon starvation (A), oxygen starvation (B), and nitrogen starvation (C). ~1-2% of  $\Delta ftsH$  cells remain viable after extended carbon starvation, in contrast to complete viability loss in stationary phase. Cultures were supplemented with 40 mM pyruvate or 10 mM glucose as a carbon source during oxygen or nitrogen starvation, respectively. Error bars show standard deviation of biological replicates in (A) and (B) ( $n = 3$ ), and representative data from two independent experiments are shown in (C).

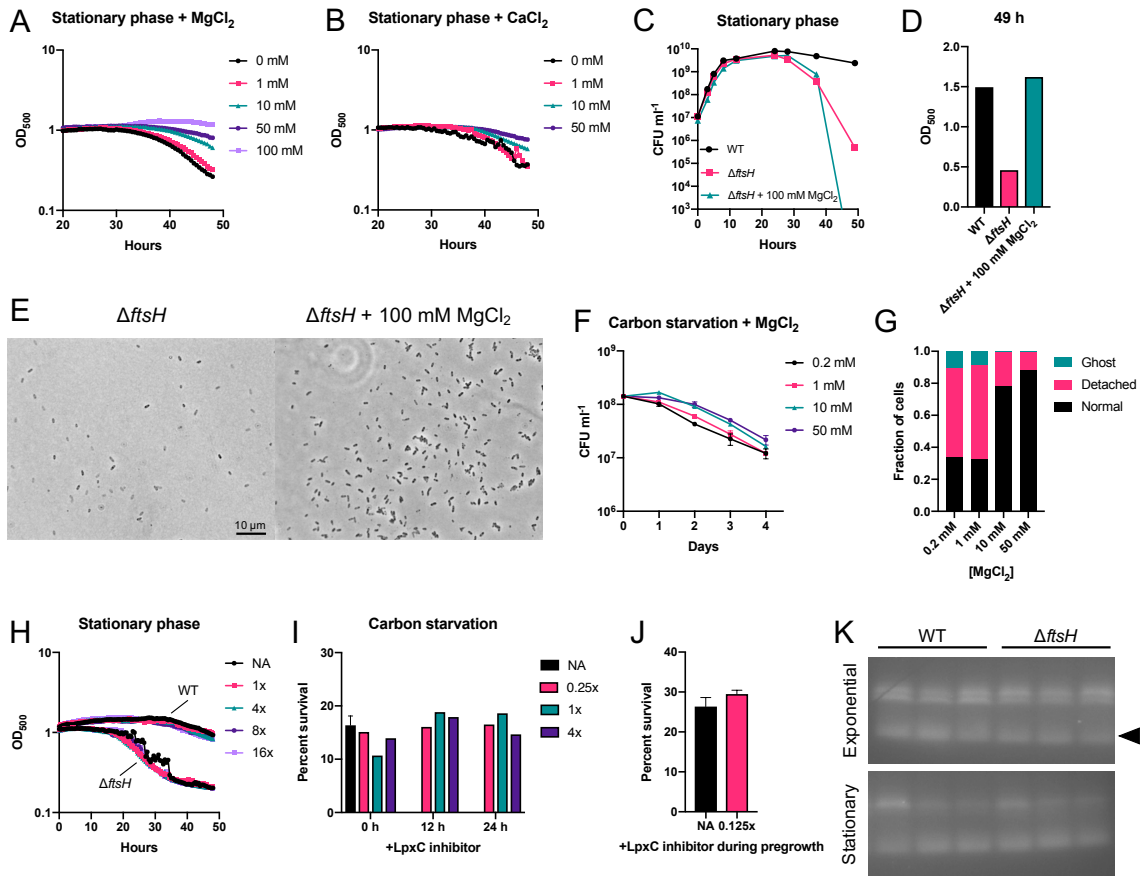

**Fig. S3. Cation supplementation and LpxC inhibition does not rescue viability of  $\DeltaftsH$  during growth arrest.** Addition of  $MgCl_2$  (A) or  $CaCl_2$  (B) to LB prevents cell lysis of  $\DeltaftsH$  during stationary phase, as measured by optical density. However, 100 mM  $MgCl_2$  does not rescue viability of  $\DeltaftsH$  (C), although it prevents cell lysis (D) and (E). Viability was below the limit of detection ( $\sim 3 \times 10^3$  CFU  $ml^{-1}$ ) for  $\DeltaftsH$  at 49 h in (C), (D), and (E). (F) Addition of  $MgCl_2$  mildly rescues viability of  $\DeltaftsH$  during carbon starvation, but the effect is transient. Error bars show standard deviation of biological replicates ( $n = 3$ ). (G)  $MgCl_2$  partially rescues the morphological defects of  $\DeltaftsH$  on day 1 of carbon starvation. A minimum of 300 cells were counted for each  $MgCl_2$  concentration. (H) Addition of the LpxC inhibitor CHIR-090 to stationary phase cells of  $\DeltaftsH$  does not prevent cell lysis. The concentration of inhibitor was 1x-16x the minimum inhibitory concentration (MIC) ( $1 \mu g ml^{-1}$ ). (I) Addition of CHIR-090 after 0 h, 12 h, or 24 h of carbon

starvation does not rescue viability of  $\DeltaftsH$  on day 3 of carbon starvation. NA = nothing added.

Error bar shows standard deviation of biological replicates ( $n = 3$ ) in the NA condition. (J)

Addition of a sub-MIC concentration of CHIR-090 to  $\DeltaftsH$  cells during growth does not rescue viability on day 3 of carbon starvation. Error bar shows standard deviation of biological replicates

( $n = 3$ ). (K) The amount of LPS is similar between WT and  $\DeltaftsH$  during exponential phase and

stationary phase. Cell lysates were separated by SDS/PAGE and stained with Pro-Q Emerald

300 LPS Gel Stain Kit and LPS was visualized by UV transillumination. The arrowhead indicates

LPS-core.

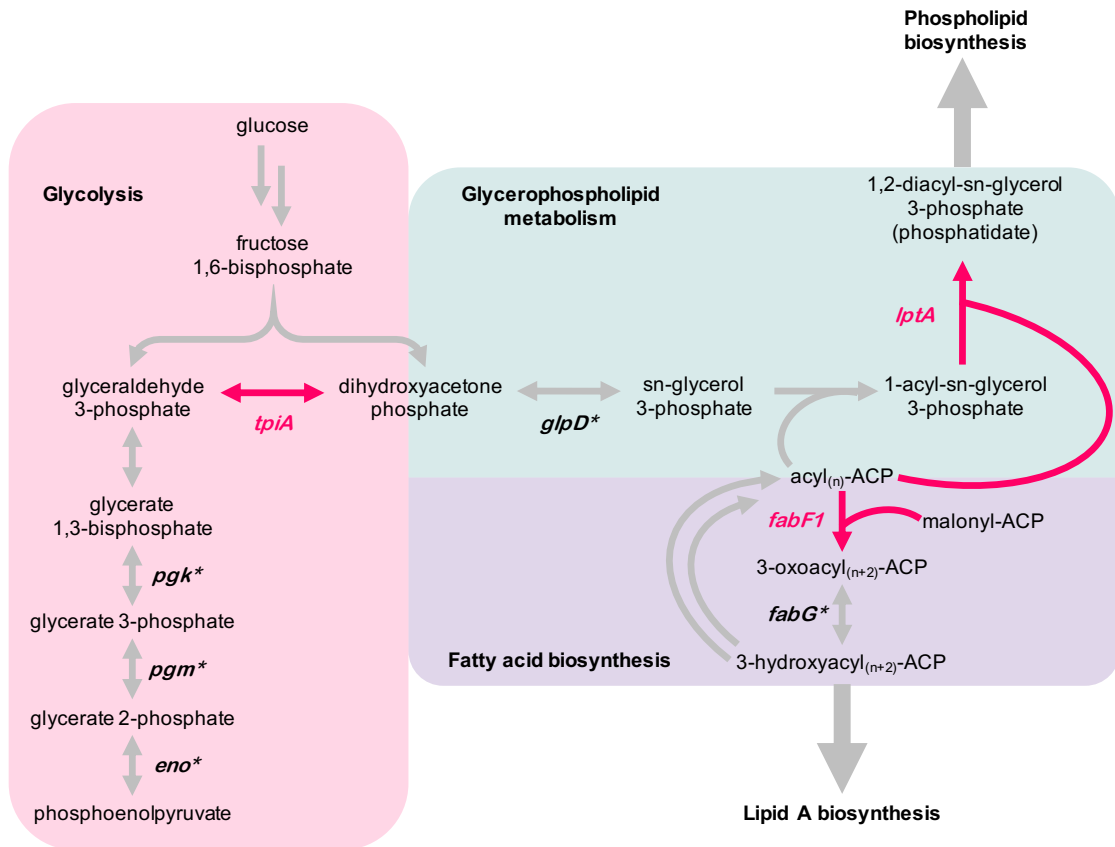

**Fig. S4. Genetic interactions with *ftsH* at the intersection of glycolysis, fatty acid biosynthesis, and phospholipid metabolism.** Genes catalyzing the reactions in red were >10-fold depleted in reads ( $P < 0.05$ ) in the  $\Delta ftsH$  background compared to the WT background. Genes denoted with an asterisk also had a statistically significant depletion in reads, but the depletion was <10-fold (Dataset S1).

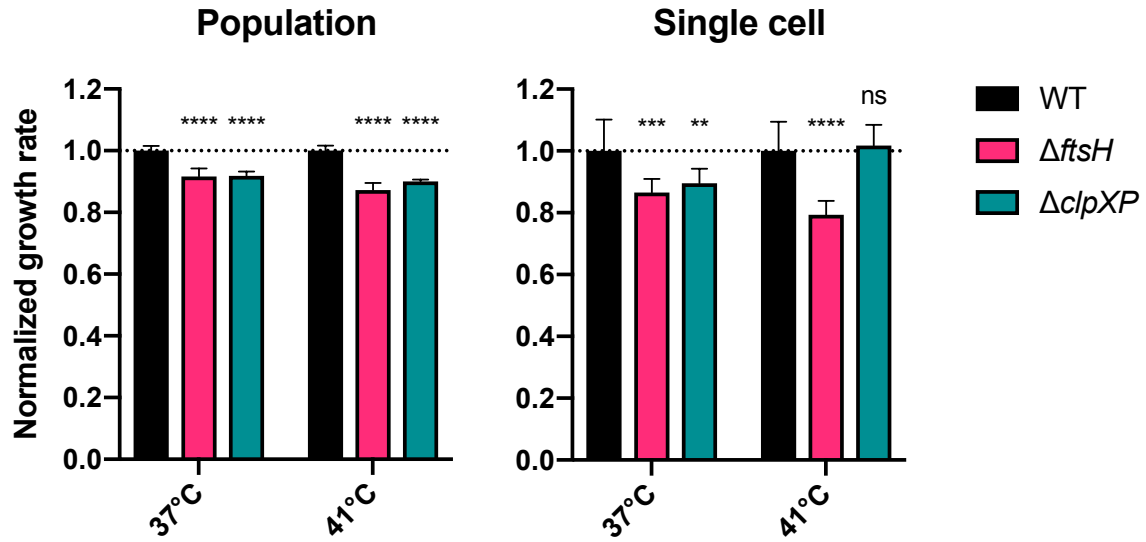

**Fig. S5. Comparison of population and single cell growth rates at high temperature.** All growth rates were normalized to the WT growth rate in LB at the indicated temperature. The population growth rate was measured using optical density and the single cell growth rate was measured using time-lapse microscopy (see Materials and Methods). High temperature experiments were performed at 41°C, as this was the maximum temperature that could be stably maintained in the time-lapse incubation chamber. Results of one-way ANOVA with Dunnett's multiple comparisons test are denoted as follows: ns = not significant; \*\*,  $P < 0.005$ ; \*\*\*,  $P < 0.0005$ ; \*\*\*\*,  $P < 0.0001$ . Error bars show standard deviation of biological replicates ( $n \geq 6$  for population and  $n \geq 9$  for single cell growth rates).

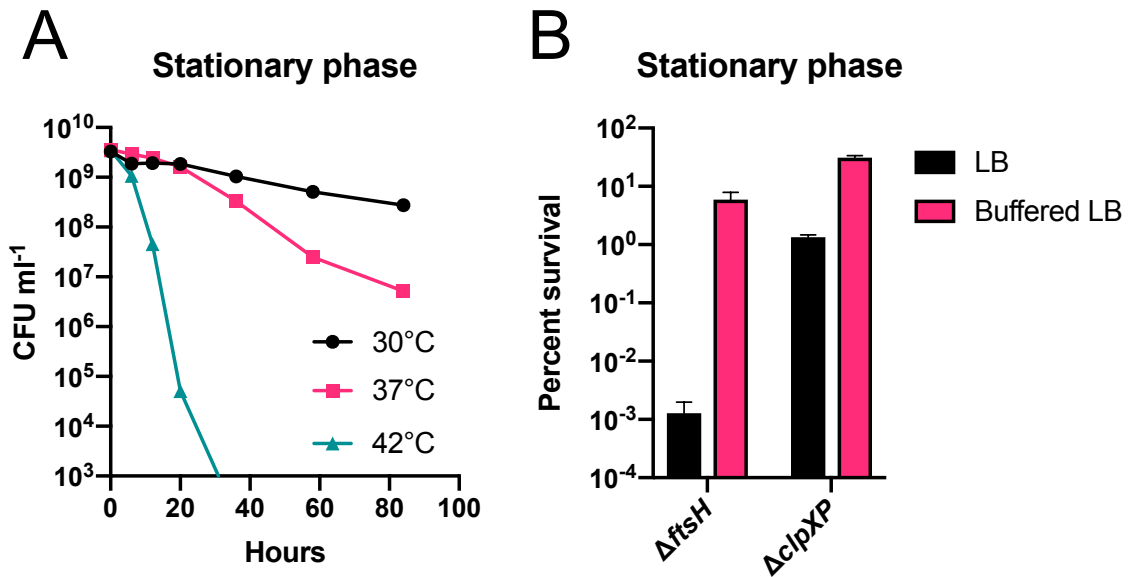

**Fig. S6. Heat and alkaline pH exacerbate survival defects of protease mutants.** (A) Survival of  $\Delta clpXP$  during stationary phase is reduced at higher temperature. Cultures were grown to stationary phase in LB at 37°C and then incubated at the indicated temperature. Viability was below the limit of detection ( $\sim 1.7 \times 10^2$  CFU ml<sup>-1</sup>) at 42°C after 36 h. (B) Incubation in MOPS buffered LB at 37°C mitigates cell death of  $\DeltaftsH$  and  $\Delta clpXP$  during stationary phase. Percent survival is measured as the ratio of CFU ml<sup>-1</sup> after 40 h in stationary phase relative to 16 h in stationary phase. Error bars show standard deviation of biological replicates (n = 3).



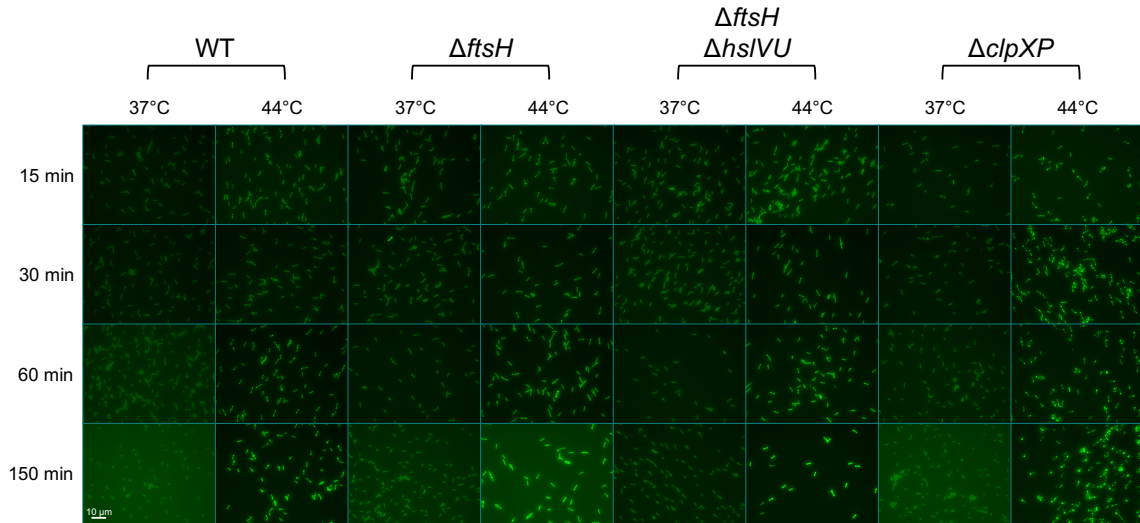

**Fig. S7. Heat shock induces rapid protein aggregation.** Fluorescence of cells expressing the lbpA-mVenus reporter during exponential growth at 37°C and upon heat shock at 44°C. Duplicate cultures of each strain were grown to exponential phase at 37°C and then one culture of each strain was shifted to 44°C. Samples of each strain/temperature condition were imaged at the indicated time points following the temperature shift. All images were taken using the same exposure time (2000 ms) and are displayed with the same brightness and contrast.

**Table S1. Strains used in this study.**

| <b><i>P. aeruginosa</i> strains</b>                                                                | <b>Description</b>                                                                                                                                             | <b>Reference</b> |
|----------------------------------------------------------------------------------------------------|----------------------------------------------------------------------------------------------------------------------------------------------------------------|------------------|
| DKN263; PA14 WT                                                                                    | UCBPP-PA14, wild type (WT)                                                                                                                                     |                  |
| DKN1992; PA14 $\Delta$ <i>ftsH</i>                                                                 | WT with a deletion in <i>ftsH</i> (PA14_62860); made using pDB36                                                                                               | This study       |
| DKN1993; PA14 $\Delta$ <i>hsIVU</i>                                                                | WT with a deletion in <i>hsIVU</i> (PA14_66770; 66790); made using pDB48                                                                                       | This study       |
| DKN1994; PA14 $\Delta$ <i>lon</i>                                                                  | WT with a deletion in <i>lon</i> (PA14_41220); made using pDB54                                                                                                | This study       |
| DKN1995; PA14 $\Delta$ <i>clpXP</i>                                                                | WT with a deletion in <i>clpXP</i> (PA14_41230; 41240); made using pDB55                                                                                       | This study       |
| DKN1996; PA14 $\Delta$ <i>amgRS</i>                                                                | WT with a deletion in <i>amgRS</i> (PA14_68680; 68700); made using pDB43                                                                                       | This study       |
| DKN1997; PA14 $\Delta$ <i>fabF1</i>                                                                | WT with a deletion in <i>fabF1</i> (PA14_25690); made using pDB49                                                                                              | This study       |
| DKN1998; PA14 $\Delta$ <i>tpiA</i>                                                                 | WT with a deletion in <i>tpiA</i> (PA14_62830); made using pDB50                                                                                               | This study       |
| DKN1999; PA14 $\Delta$ <i>lptA</i>                                                                 | WT with a deletion in <i>lptA</i> (PA14_00060); made using pDB51                                                                                               | This study       |
| DKN2000; PA14 $\Delta$ <i>htpX</i>                                                                 | WT with a deletion in <i>htpX</i> (PA14_27480); made using pDB58                                                                                               | This study       |
| DKN2001; PA14 $\Delta$ <i>lon</i> $\Delta$ <i>clpXP</i>                                            | WT with a deletion in <i>lon</i> and <i>clpXP</i> (PA14_41220; 41230; 41240); made using pDB56                                                                 | This study       |
| DKN2002; PA14 $\Delta$ <i>ftsH</i> $\Delta$ <i>hsIVU</i>                                           | $\Delta$ <i>ftsH</i> with a deletion in <i>hsIVU</i> ; made using pDB48                                                                                        | This study       |
| DKN2003; PA14 $\Delta$ <i>ftsH</i> $\Delta$ <i>lon</i>                                             | $\Delta$ <i>ftsH</i> with a deletion in <i>lon</i> ; made using pDB54                                                                                          | This study       |
| DKN2004; PA14 $\Delta$ <i>ftsH</i> $\Delta$ <i>clpXP</i>                                           | $\Delta$ <i>ftsH</i> with a deletion in <i>clpXP</i> ; made using pDB55                                                                                        | This study       |
| DKN2005; PA14 $\Delta$ <i>hsIVU</i> $\Delta$ <i>lon</i>                                            | $\Delta$ <i>hsIVU</i> with a deletion in <i>lon</i> ; made using pDB54                                                                                         | This study       |
| DKN2006; PA14 $\Delta$ <i>hsIVU</i> $\Delta$ <i>clpXP</i>                                          | $\Delta$ <i>hsIVU</i> with a deletion in <i>clpXP</i> ; made using pDB55                                                                                       | This study       |
| DKN2007; PA14 $\Delta$ <i>ftsH</i> $\Delta$ <i>hsIVU</i> $\Delta$ <i>lon</i>                       | $\Delta$ <i>ftsH</i> $\Delta$ <i>lon</i> with a deletion in <i>hsIVU</i> ; made using pDB48                                                                    | This study       |
| DKN2008; PA14 $\Delta$ <i>ftsH</i> $\Delta$ <i>hsIVU</i> $\Delta$ <i>clpXP</i>                     | $\Delta$ <i>ftsH</i> $\Delta$ <i>clpXP</i> with a deletion in <i>hsIVU</i> ; made using pDB48                                                                  | This study       |
| DKN2009; PA14 $\Delta$ <i>ftsH</i> $\Delta$ <i>lon</i> $\Delta$ <i>clpXP</i>                       | $\Delta$ <i>ftsH</i> with a deletion in <i>lon</i> and <i>clpXP</i> ; made using pDB56                                                                         | This study       |
| DKN2010; PA14 $\Delta$ <i>hsIVU</i> $\Delta$ <i>lon</i> $\Delta$ <i>clpXP</i>                      | $\Delta$ <i>hsIVU</i> with a deletion in <i>lon</i> and <i>clpXP</i> ; made using pDB56                                                                        | This study       |
| DKN2011; PA14 $\Delta$ <i>ftsH</i> $\Delta$ <i>hsIVU</i> $\Delta$ <i>lon</i> $\Delta$ <i>clpXP</i> | $\Delta$ <i>hsIVU</i> $\Delta$ <i>lon</i> $\Delta$ <i>clpXP</i> with a deletion in <i>ftsH</i> ; made using pDB36                                              | This study       |
| DKN2013; PA14 $\Delta$ <i>ftsH</i> $\Delta$ <i>amgRS</i>                                           | $\Delta$ <i>ftsH</i> with a deletion in <i>amgRS</i> ; made using pDB43                                                                                        | This study       |
| DKN2014; PA14 $\Delta$ <i>ftsH</i> $\Delta$ <i>fabF1</i>                                           | $\Delta$ <i>ftsH</i> with a deletion in <i>fabF1</i> ; made using pDB49                                                                                        | This study       |
| DKN2015; PA14 $\Delta$ <i>ftsH</i> $\Delta$ <i>tpiA</i>                                            | $\Delta$ <i>ftsH</i> with a deletion in <i>tpiA</i> ; made using pDB50                                                                                         | This study       |
| DKN2016; PA14 $\Delta$ <i>ftsH</i> $\Delta$ <i>lptA</i>                                            | $\Delta$ <i>ftsH</i> with a deletion in <i>lptA</i> ; made using pDB51                                                                                         | This study       |
| DKN2017; PA14 $\Delta$ <i>ftsH</i> $\Delta$ <i>htpX</i>                                            | $\Delta$ <i>ftsH</i> with a deletion in <i>htpX</i> ; made using pDB58                                                                                         | This study       |
| DKN2018; PA14 $\Delta$ <i>ftsH</i> / <i>+ftsH</i>                                                  | <i>ftsH</i> complemented at the <i>attTn7</i> site on the chromosome; made using pDB37                                                                         | This study       |
| DKN2019; PA14 WT:: <i>lbpA</i> -mVenus                                                             | PA14 expressing <i>lbpA</i> ORF fused to mVenus inserted at the <i>attTn7</i> site on the chromosome; made using pLREX97                                       | This study       |
| DKN2020; PA14 $\Delta$ <i>ftsH</i> :: <i>lbpA</i> -mVenus                                          | $\Delta$ <i>ftsH</i> expressing <i>lbpA</i> ORF fused to mVenus inserted at the <i>attTn7</i> site on the chromosome; made using pLREX97                       | This study       |
| DKN2021; PA14 $\Delta$ <i>ftsH</i> $\Delta$ <i>hsIVU</i> :: <i>lbpA</i> -mVenus                    | $\Delta$ <i>ftsH</i> $\Delta$ <i>hsIVU</i> expressing <i>lbpA</i> ORF fused to mVenus inserted at the <i>attTn7</i> site on the chromosome; made using pLREX97 | This study       |
|                                                                                                    |                                                                                                                                                                |                  |
| <b><i>E. coli</i> strains</b>                                                                      | <b>Description</b>                                                                                                                                             | <b>Reference</b> |
| DKN89; DH10B                                                                                       | Host for routine cloning and plasmid stocks                                                                                                                    | (8)              |
| DKN1298; SM10  <i>pir</i>                                                                          | Helper strain for integration at the <i>attTn7</i> site and for generation of the transposon library in <i>P. aeruginosa</i> (carries pTNS1 or pIT2)           | (9)              |
| DKN1299; HB101                                                                                     | Helper strain for integration at the <i>attTn7</i> site and for making unmarked deletions in <i>P. aeruginosa</i> (carries pRK2013)                            | (9)              |

**Table S2. Plasmids used in this study.**

| Plasmid          | Description                                                                                                                                | Reference  |
|------------------|--------------------------------------------------------------------------------------------------------------------------------------------|------------|
| pMQ30            | Conjugal vector for making unmarked deletions in <i>P. aeruginosa</i>                                                                      | (10)       |
| pUC18T-mini-Tn7T | Conjugal vector for inserting genes at the <i>attTn7</i> site in <i>P. aeruginosa</i>                                                      | (9)        |
| pTNS1            | Helper plasmid for integration at the <i>attTn7</i> site (carried by SM10)                                                                 | (9)        |
| pRK2013          | Helper plasmid for integration at the <i>attTn7</i> site and for making unmarked deletions in <i>P. aeruginosa</i> (carried by HB101)      | (9)        |
| pIT2             | Vector containing transposon T8 ( <i>ISlacZhah-tc</i> ) for generation of the transposon library in <i>P. aeruginosa</i> (carried by SM10) | (11)       |
| pDB36            | <i>ftsH</i> deletion vector; ~1kb upstream and ~1kb downstream of <i>ftsH</i> ORF cloned into pMQ30                                        | This study |
| pDB48            | <i>hs/VU</i> deletion vector; ~1kb upstream and ~1kb downstream of <i>hs/VU</i> ORF cloned into pMQ30                                      | This study |
| pDB54            | <i>lon</i> deletion vector; ~1kb upstream and ~1kb downstream of <i>lon</i> ORF cloned into pMQ30                                          | This study |
| pDB55            | <i>clpXP</i> deletion vector; ~1kb upstream and ~1kb downstream of <i>clpXP</i> ORF cloned into pMQ30                                      | This study |
| pDB43            | <i>amgRS</i> deletion vector; ~1kb upstream and ~1kb downstream of <i>amgRS</i> ORF cloned into pMQ30                                      | This study |
| pDB49            | <i>fabF1</i> deletion vector; ~1kb upstream and ~1kb downstream of <i>fabF1</i> ORF cloned into pMQ30                                      | This study |
| pDB50            | <i>tpiA</i> deletion vector; ~1kb upstream and ~1kb downstream of <i>tpiA</i> ORF cloned into pMQ30                                        | This study |
| pDB51            | <i>lptA</i> deletion vector; ~1kb upstream and ~1kb downstream of <i>lptA</i> ORF cloned into pMQ30                                        | This study |
| pDB58            | <i>htpX</i> deletion vector; ~1kb upstream and ~1kb downstream of <i>htpX</i> ORF cloned into pMQ30                                        | This study |
| pDB56            | <i>lon</i> and <i>clpXP</i> deletion vector; ~1kb upstream and ~1kb downstream of <i>lon/clpXP</i> locus cloned into pMQ30                 | This study |
| pDB37            | <i>ftsH</i> complementation vector; <i>ftsH</i> promoter region and ORF cloned into pUC18T-mini-Tn7T                                       | This study |
| pLREX97          | <i>ibpA-mVenus</i> expression vector; <i>ibpA</i> promoter region and ORF fused to mVenus cloned into pUC18T-mini-Tn7T                     | This study |

**Table S3. Primers used in this study.**

| Primer                      | Sequence                                                              | Description                                                                                                  |
|-----------------------------|-----------------------------------------------------------------------|--------------------------------------------------------------------------------------------------------------|
| pDB36                       |                                                                       |                                                                                                              |
| <i>ftsH</i> Upstream Fwd    | taaaacgacggccagtgccaGTGGTGACCGATA<br>GATTGAACTG                       | LC: overlap with pMQ30; UC: complementary to 5' end of <i>ftsH</i> upstream region                           |
| <i>ftsH</i> Upstream Rev    | cttcaggttGATGATCAGCCACAGAATCAGA<br>TTC                                | LC: overlap with <i>ftsH</i> downstream region; UC: complementary to 3' end of <i>ftsH</i> upstream region   |
| <i>ftsH</i> Downstream Fwd  | gctgatcatcAACCTGGAAGAGTCGGGC                                          | LC: overlap with <i>ftsH</i> upstream region; UC: complementary to 5' end of <i>ftsH</i> downstream region   |
| <i>ftsH</i> Downstream Rev  | catgattacgaattcgagctACTCGCCAACACGA<br>CCAC                            | LC: overlap with pMQ30; UC: complementary to 3' end of <i>ftsH</i> downstream region                         |
| pDB48                       |                                                                       |                                                                                                              |
| <i>hsIVU</i> Upstream Fwd   | taaaacgacggccagtgccaTGATCAACAACGT<br>CGCGC                            | LC: overlap with pMQ30; UC: complementary to 5' end of <i>hsIVU</i> upstream region                          |
| <i>hsIVU</i> Upstream Rev   | cggttcgggaGGGGGAAATCTCCACACTG                                         | LC: overlap with <i>hsIVU</i> downstream region; UC: complementary to 3' end of <i>hsIVU</i> upstream region |
| <i>hsIVU</i> Downstream Fwd | gatttccccTCCCGAACCGGGGTATCC                                           | LC: overlap with <i>hsIVU</i> upstream region; UC: complementary to 5' end of <i>hsIVU</i> downstream region |
| <i>hsIVU</i> Downstream Rev | catgattacgaattcgagctAGGTCTGCATGTAG<br>CGCTTG                          | LC: overlap with pMQ30; UC: complementary to 3' end of <i>hsIVU</i> downstream region                        |
| pDB54                       |                                                                       |                                                                                                              |
| <i>lon</i> Upstream Fwd     | taaaacgacggccagtgccaACGTGCCGTTTAC<br>CATCG                            | LC: overlap with pMQ30; UC: complementary to 5' end of <i>lon</i> upstream region                            |
| <i>lon</i> Upstream Rev     | tacctaccgaAATGTCCGCTCTACAGCGG<br>agccgacattTCGGTAGGTATTCTTGACACT<br>G | LC: overlap with <i>lon</i> downstream region; UC: complementary to 3' end of <i>lon</i> upstream region     |
| <i>lon</i> Downstream Fwd   | catgattacgaattcgagctTGCAGGATCAACTG<br>GTCC                            | LC: overlap with <i>lon</i> upstream region; UC: complementary to 5' end of <i>lon</i> downstream region     |
| <i>lon</i> Downstream Rev   | catgattacgaattcgagctTGCAGGATCAACTG<br>GTCC                            | LC: overlap with pMQ30; UC: complementary to 3' end of <i>lon</i> downstream region                          |
| pDB55                       |                                                                       |                                                                                                              |
| <i>clpXP</i> Upstream Fwd   | taaaacgacggccagtgccaAGTTTCCGATGCT<br>GATGTC                           | LC: overlap with pMQ30; UC: complementary to 5' end of <i>clpXP</i> upstream region                          |
| <i>clpXP</i> Upstream Rev   | ccctgctcttGTCTTGCATCACTCCCTAAC                                        | LC: overlap with <i>clpXP</i> downstream region; UC: complementary to 3' end of <i>clpXP</i> upstream region |
| <i>clpXP</i> Downstream Fwd | atcgcaagacAAGAGCAGGGGCCTTCGG                                          | LC: overlap with <i>clpXP</i> upstream region; UC: complementary to 5' end of <i>clpXP</i> downstream region |
| <i>clpXP</i> Downstream Rev | catgattacgaattcgagctAGCAGCCAGTCTAT<br>GTAGGAAC                        | LC: overlap with pMQ30; UC: complementary to 3' end of <i>clpXP</i> downstream region                        |
| pDB43                       |                                                                       |                                                                                                              |
| <i>amgRS</i> Upstream Fwd   | taaaacgacggccagtgccaATCATGACTTCGC<br>TTGGGTG                          | LC: overlap with pMQ30; UC: complementary to 5' end of <i>amgRS</i> upstream region                          |
| <i>amgRS</i> Upstream Rev   | ccgtcgagtaAGAACTCCCAGAATGAGTCA<br>GG                                  | LC: overlap with <i>amgRS</i> downstream region; UC: complementary to 3' end of <i>amgRS</i> upstream region |
| <i>amgRS</i> Downstream Fwd | gggagtttctTACTCGACGGGTTTGTGCCG                                        | LC: overlap with <i>amgRS</i> upstream region; UC: complementary to 5' end of <i>amgRS</i> downstream region |
| <i>amgRS</i> Downstream Rev | catgattacgaattcgagctTCGTCCCTCCTCCG<br>ACCAGAC                         | LC: overlap with pMQ30; UC: complementary to 3' end of <i>amgRS</i> downstream region                        |
| pDB49                       |                                                                       |                                                                                                              |
| <i>fabF1</i> Upstream Fwd   | taaaacgacggccagtgccaAACCGCTGATCGT<br>GGTCAATAAC                       | LC: overlap with pMQ30; UC: complementary to 5' end of <i>fabF1</i> upstream region                          |

|                                    |                                                                |                                                                                                                         |
|------------------------------------|----------------------------------------------------------------|-------------------------------------------------------------------------------------------------------------------------|
| <i>fabF1</i> Upstream Rev          | gggtgccgtTACGACTTCCTCTTTCTCATT<br>CAC                          | LC: overlap with <i>fabF1</i> downstream region; UC:<br>complementary to 3' end of <i>fabF1</i> upstream region         |
| <i>fabF1</i> Downstream<br>Fwd     | ggaagtcgtaAACGGCACCCCTGGTGTTC                                  | LC: overlap with <i>fabF1</i> upstream region; UC:<br>complementary to 5' end of <i>fabF1</i> downstream region         |
| <i>fabF1</i> Downstream<br>Rev     | catgattacgaattcgagctGAAACGTCCAGCAG<br>GCGC                     | LC: overlap with pMQ30; UC: complementary to 3' end of<br><i>fabF1</i> downstream region                                |
| pDB50                              |                                                                |                                                                                                                         |
| <i>tpiA</i> Upstream Fwd           | taaaacgacggccagtgccaTCGAGCTGATGAT<br>CGAGGAACTG                | LC: overlap with pMQ30; UC: complementary to 5' end of<br><i>tpiA</i> upstream region                                   |
| <i>tpiA</i> Upstream Rev           | gacagatcgcGCTGTACCTCGCGGGGCA                                   | LC: overlap with <i>tpiA</i> downstream region; UC:<br>complementary to 3' end of <i>tpiA</i> upstream region           |
| <i>tpiA</i> Downstream Fwd         | gaggtacagcGCGATCTGTCTGTCGCCGCG                                 | LC: overlap with <i>tpiA</i> upstream region; UC: complementary<br>to 5' end of <i>tpiA</i> downstream region           |
| <i>tpiA</i> Downstream Rev         | catgattacgaattcgagctACCTCCAGGGTGT<br>CTCGCCG                   | LC: overlap with pMQ30; UC: complementary to 3' end of<br><i>tpiA</i> downstream region                                 |
| pDB51                              |                                                                |                                                                                                                         |
| <i>lptA</i> Upstream Fwd           | taaaacgacggccagtgccaCTTTCGGTCCATT<br>CCTTG                     | LC: overlap with pMQ30; UC: complementary to 5' end of<br><i>lptA</i> upstream region                                   |
| <i>lptA</i> Upstream Rev           | ttgcgccctGTATTCTGACCTTACTGAAGTA<br>ATG                         | LC: overlap with <i>lptA</i> downstream region; UC:<br>complementary to 3' end of <i>lptA</i> upstream region           |
| <i>lptA</i> Downstream Fwd         | gtcagaatacAGGGCCGCAAAGCCCCCT                                   | LC: overlap with <i>lptA</i> upstream region; UC: complementary<br>to 5' end of <i>lptA</i> downstream region           |
| <i>lptA</i> Downstream Rev         | catgattacgaattcgagctACGTCAACGAGCAC<br>GCTCCG                   | LC: overlap with pMQ30; UC: complementary to 3' end of<br><i>lptA</i> downstream region                                 |
| pDB58                              |                                                                |                                                                                                                         |
| <i>htpX</i> Upstream Fwd           | taaaacgacggccagtgccaAAGGTCTCGACAT<br>CCTCG                     | LC: overlap with pMQ30; UC: complementary to 5' end of<br><i>htpX</i> upstream region                                   |
| <i>htpX</i> Upstream Rev           | tgaagcggaGGTGTAAGCTTCTCCTCAC<br>G                              | LC: overlap with <i>htpX</i> downstream region; UC:<br>complementary to 3' end of <i>htpX</i> upstream region           |
| <i>htpX</i> Downstream Fwd         | gctttacaccTCCGCTTTCACACTTGGG                                   | LC: overlap with <i>htpX</i> upstream region; UC:<br>complementary to 5' end of <i>htpX</i> downstream region           |
| <i>htpX</i> Downstream Rev         | catgattacgaattcgagctCGGAAGCGTTGCTC<br>GAGC                     | LC: overlap with pMQ30; UC: complementary to 3' end of<br><i>htpX</i> downstream region                                 |
| pDB56                              |                                                                |                                                                                                                         |
| <i>lon/clpXP</i> Upstream<br>Fwd   | taaaacgacggccagtgccaAGTTTCCGATGCT<br>GATGTC                    | LC: overlap with pMQ30; UC: complementary to 5' end of<br><i>lon/clpXP</i> upstream region                              |
| <i>lon/clpXP</i> Upstream<br>Rev   | tacctaccgaGTCTTGCGATCACTCCCTAAC                                | LC: overlap with <i>lon/clpXP</i> downstream region; UC:<br>complementary to 3' end of <i>lon/clpXP</i> upstream region |
| <i>lon/clpXP</i> Downstream<br>Fwd | atcgaagacTCGGTAGGTATTCTTGACACT<br>G                            | LC: overlap with <i>lon/clpXP</i> upstream region; UC:<br>complementary to 5' end of <i>lon/clpXP</i> downstream region |
| <i>lon/clpXP</i> Downstream<br>Rev | catgattacgaattcgagctTGCAGGATCAACTG<br>GTCC                     | LC: overlap with pMQ30; UC: complementary to 3' end of<br><i>lon/clpXP</i> downstream region                            |
| pDB37                              |                                                                |                                                                                                                         |
| <i>ftsH</i> Fwd                    | aattcgatcatgcatgagctATCCTCGAGATGGA<br>CAGCATCC                 | LC: overlap with pUC18T-mini-Tn7T; UC: complementary<br>to 5' end of <i>ftsH</i> upstream region                        |
| <i>ftsH</i> Rev                    | ttcgcgaggtaccgggccaGCAAGGCAGTCGG<br>GTCGG                      | LC: overlap with pUC18T-mini-Tn7T; UC: complementary<br>to 3' end of <i>ftsH</i> downstream region                      |
| pLREX97                            |                                                                |                                                                                                                         |
| <i>ibpA</i> Upstream Fwd           | aggccttcgaggtaccgggccaagcttTCAGTAG<br>CGAGTGAAGGTCAGGTAGTCGGC  | LC: overlap with pUC18T-mini-Tn7T; UC: complementary<br>to 5' end of <i>ibpA</i> upstream region                        |
| <i>ibpA</i> Rev                    | cgatcccgtgccagacggtccctgcccgatccCTGGT<br>TGTCAGTGCCGGGCGCTGGCC | LC: overlap with 5' end of Linker+ <i>mVenus</i> ; UC:<br>complementary to 3' end of <i>ibpA</i>                        |

|                           |                                                                  |                                                                                               |
|---------------------------|------------------------------------------------------------------|-----------------------------------------------------------------------------------------------|
| Linker+ <i>mVenus</i> Fwd | ggccagcgcccggcactggacaaccagGGATCCG<br>GGCAGGGACCGTCTGGCCAGGGATCG | LC: overlap with 3' end of <i>ibpA</i> ; UC: complementary to 5' end of Linker+ <i>mVenus</i> |
| <i>mVenus</i> Rev         | gctaattcgatcatgcatgagctcactagTACTTTGTA<br>CAGCTCGTCCATGCCGAGAGTG | LC: overlap with pUC18T-mini-Tn7T; UC: complementary to 3' end of <i>mVenus</i>               |

LC: Lowercase

UC: Uppercase

Linker: GGATCCGGGCAGGGACCGTCTGGCCAGGGATCGGGGCCAGGATCAGGTCAAGGCTCCGGT

**Table S4. Functional categories of genes that have an aggravating interaction with *ftsH* during growth. Insertions are >10-fold depleted ( $P < 0.05$ ) in the  $\Delta$ *ftsH* library background compared to the WT library background.**

| Locus      | Gene name    | Description                                        | Functional category                                          | Read ratio  | P value     |
|------------|--------------|----------------------------------------------------|--------------------------------------------------------------|-------------|-------------|
| PA14_03880 | <i>spuB</i>  | glutamine synthetase                               | Amino acid transport and metabolism                          | 0.029829957 | 0.019768744 |
| PA14_52630 | <i>aruE</i>  | succinylglutamate desuccinylase                    | Amino acid transport and metabolism                          | 0.074124367 | 0.000667732 |
| PA14_67920 | <i>hisH</i>  | imidazole glycerol phosphate synthase subunit HisH | Amino acid transport and metabolism                          | 0.024450841 | 0.000734266 |
| PA14_62830 | <i>tpiA</i>  | triosephosphate isomerase                          | Carbohydrate transport and metabolism                        | 0.004666208 | 0.006462704 |
| PA14_19170 |              | hypothetical protein                               | Cell envelope biogenesis, outer membrane                     | 0.064410998 | 0.00952381  |
| PA14_66120 | <i>ssg</i>   | hypothetical protein                               | Cell envelope biogenesis, outer membrane                     | 0.007052033 | 4.24E-05    |
| PA14_66160 | <i>wapH</i>  | glycosyl transferase family protein                | Cell envelope biogenesis, outer membrane                     | 0.031246536 | 5.29E-05    |
| PA14_09300 |              | ABC transporter ATP-binding protein                | Defense mechanisms                                           | 0.063525034 | 4.03E-06    |
| PA14_09320 |              | ABC transporter ATP-binding protein                | Defense mechanisms                                           | 0.037609511 | 1.42E-06    |
| PA14_70390 | <i>crc</i>   | catabolite repression control protein              | DNA replication, recombination, and repair                   | 0.064077863 | 0.040662005 |
| PA14_66290 | <i>aceE</i>  | pyruvate dehydrogenase subunit E1                  | Energy production and conversion                             | 0.047988119 | 6.28E-06    |
| PA14_66310 | <i>aceF</i>  | dihydrolipoamide acetyltransferase                 | Energy production and conversion                             | 0.049134279 | 0.038782988 |
| PA14_04070 |              | hypothetical protein                               | Function unknown                                             | 0.071908993 | 0.012460317 |
| PA14_72930 |              | hypothetical protein                               | Function unknown                                             | 0.041016874 | 0.039375977 |
| PA14_14250 |              | hypothetical protein                               | Function unknown                                             | 0.049761349 | 0.008730159 |
| PA14_48400 |              | hypothetical protein                               | Function unknown                                             | 0.006560515 | 0.028571429 |
| PA14_58040 |              | hypothetical protein                               | Function unknown                                             | 0.013467284 | 0.028857143 |
| PA14_50710 | <i>shaD</i>  | ShaD                                               | Inorganic ion transport and metabolism                       | 0.005634115 | 2.51E-05    |
| PA14_70800 | <i>phoU</i>  | phosphate uptake regulatory protein PhoU           | Inorganic ion transport and metabolism                       | 0.024783057 | 0.014679487 |
| PA14_14610 | <i>yajC</i>  | preprotein translocase subunit YajC                | Intracellular trafficking and secretion                      | 0.037379051 | 0.047714286 |
| PA14_00060 | <i>lptA</i>  | acyltransferase                                    | Lipid metabolism                                             | 0.026131147 | 0.006074592 |
| PA14_25690 | <i>fabF1</i> | 3-oxoacyl-ACP synthase                             | Lipid metabolism                                             | 0.010658398 | 0.00019428  |
| PA14_64220 | <i>purD</i>  | phosphoribosylamine--glycine ligase                | Nucleotide transport and metabolism                          | 0.097334294 | 0.000789115 |
| PA14_70370 | <i>pyrE</i>  | orotate phosphoribosyltransferase                  | Nucleotide transport and metabolism                          | 0.086529909 | 0.024300699 |
| PA14_27480 | <i>htpX</i>  | heat shock protein HtpX                            | Posttranslational modification, protein turnover, chaperones | 0.004960439 | 0.018971617 |
| PA14_57530 | <i>sspA</i>  | stringent starvation protein A                     | Posttranslational modification, protein turnover, chaperones | 0.049522582 | 0.027922078 |
| PA14_63060 | <i>smpB</i>  | SsrA-binding protein                               | Posttranslational modification, protein turnover, chaperones | 0.086787305 | 0.042698413 |

|            |             |                                                 |                                                               |             |             |
|------------|-------------|-------------------------------------------------|---------------------------------------------------------------|-------------|-------------|
| PA14_66770 | <i>hslV</i> | ATP-dependent protease peptidase subunit        | Posttranslational modification, protein turnover, chaperones  | 0.056683992 | 0.007936508 |
| PA14_66790 | <i>hslU</i> | ATP-dependent protease ATP-binding subunit HslU | Posttranslational modification, protein turnover, chaperones  | 0.070003096 | 0.000201401 |
| PA14_06200 |             | hypothetical protein                            | Secondary metabolites biosynthesis, transport, and catabolism | 0.05514422  | 0.028571429 |
| PA14_68680 | <i>envZ</i> | two-component sensor EnvZ (AmgS)                | Signal transduction mechanisms                                | 0.011819731 | 2.27E-05    |
| PA14_68700 | <i>ompR</i> | osmolarity response regulator (AmgR)            | Signal transduction mechanisms                                | 0.007752306 | 0.000582751 |
| PA14_72390 |             | two-component sensor                            | Signal transduction mechanisms                                | 0.046897485 | 0.000209592 |
| PA14_06680 | <i>nirH</i> | hypothetical protein                            | Transcription                                                 | 0.018169261 | 0.007936508 |
| PA14_65950 |             | transcriptional regulator                       | Transcription                                                 | 0.026108949 | 0.03021645  |
| PA14_56070 | <i>mvaT</i> | transcriptional regulator MvaT, P16 subunit     | Transcription                                                 | 0.071169721 | 0.028571429 |



**Dataset S1 (separate file).** Read ratios for each gene and intergenic region in the Tn-seq experiment. Ratios are derived from read counts in the  $\DeltaftsH$  library background divided by the WT library background. IG = intergenic region.

**Dataset S2 (separate file).** Raw read counts for each gene and intergenic region in each Tn-seq library. The genome is divided into 100 bp windows and total reads within each window are aggregated. IG = intergenic region.

## References

1. Sutterlin HA, et al. (2016) Disruption of lipid homeostasis in the Gram-negative cell envelope activates a novel cell death pathway. *Proc Natl Acad Sci USA* 113(11):E1565-74.
2. Nikaido H (2003) Molecular basis of bacterial outer membrane permeability revisited. *Microbiol Mol Biol Rev* 67(4):593–656.
3. May KL, Silhavy TJ (2018) The Escherichia coli Phospholipase PldA Regulates Outer Membrane Homeostasis via Lipid Signaling. *MBio* 9(2).
4. Ogura T, et al. (1999) Balanced biosynthesis of major membrane components through regulated degradation of the committed enzyme of lipid A biosynthesis by the AAA protease FtsH (HflB) in *Escherichia coli*. *Mol Microbiol* 31(3):833–844.
5. Langklotz S, Schäkermann M, Narberhaus F (2011) Control of lipopolysaccharide biosynthesis by FtsH-mediated proteolysis of LpxC is conserved in enterobacteria but not in all Gram-negative bacteria. *J Bacteriol* 193(5):1090–1097.
6. Schäkermann M, Langklotz S, Narberhaus F (2013) FtsH-mediated coordination of lipopolysaccharide biosynthesis in *Escherichia coli* correlates with the growth rate and the alarmone (p)ppGpp. *J Bacteriol* 195(9):1912–1919.
7. McClerren AL, et al. (2005) A slow, tight-binding inhibitor of the zinc-dependent deacetylase LpxC of lipid A biosynthesis with antibiotic activity comparable to ciprofloxacin. *Biochemistry* 44(50):16574–16583.
8. Casadaban MJ, Cohen SN (1980) Analysis of gene control signals by DNA fusion and cloning in *Escherichia coli*. *J Mol Biol* 138(2):179–207.
9. Choi K-H, Schweizer HP (2006) mini-Tn7 insertion in bacteria with single attTn7 sites: example *Pseudomonas aeruginosa*. *Nat Protoc* 1(1):153–161.
10. Shanks RMQ, Caiazza NC, Hinsa SM, Toutain CM, O'Toole GA (2006) *Saccharomyces cerevisiae*-based molecular tool kit for manipulation of genes from gram-negative bacteria. *Appl Environ Microbiol* 72(7):5027–5036.
11. Jacobs MA, et al. (2003) Comprehensive transposon mutant library of *Pseudomonas aeruginosa*. *Proc Natl Acad Sci USA* 100(24):14339–14344.
